# Supplementary figures and images for: Combination of radiotherapy and suppression of Tregs enhances abscopal antitumor effect and inhibits metastasis in rectal cancer
Source: HighWire-hosted journal article supplement (doi:10.1136/jitc-2020-000826), 2020-10-01

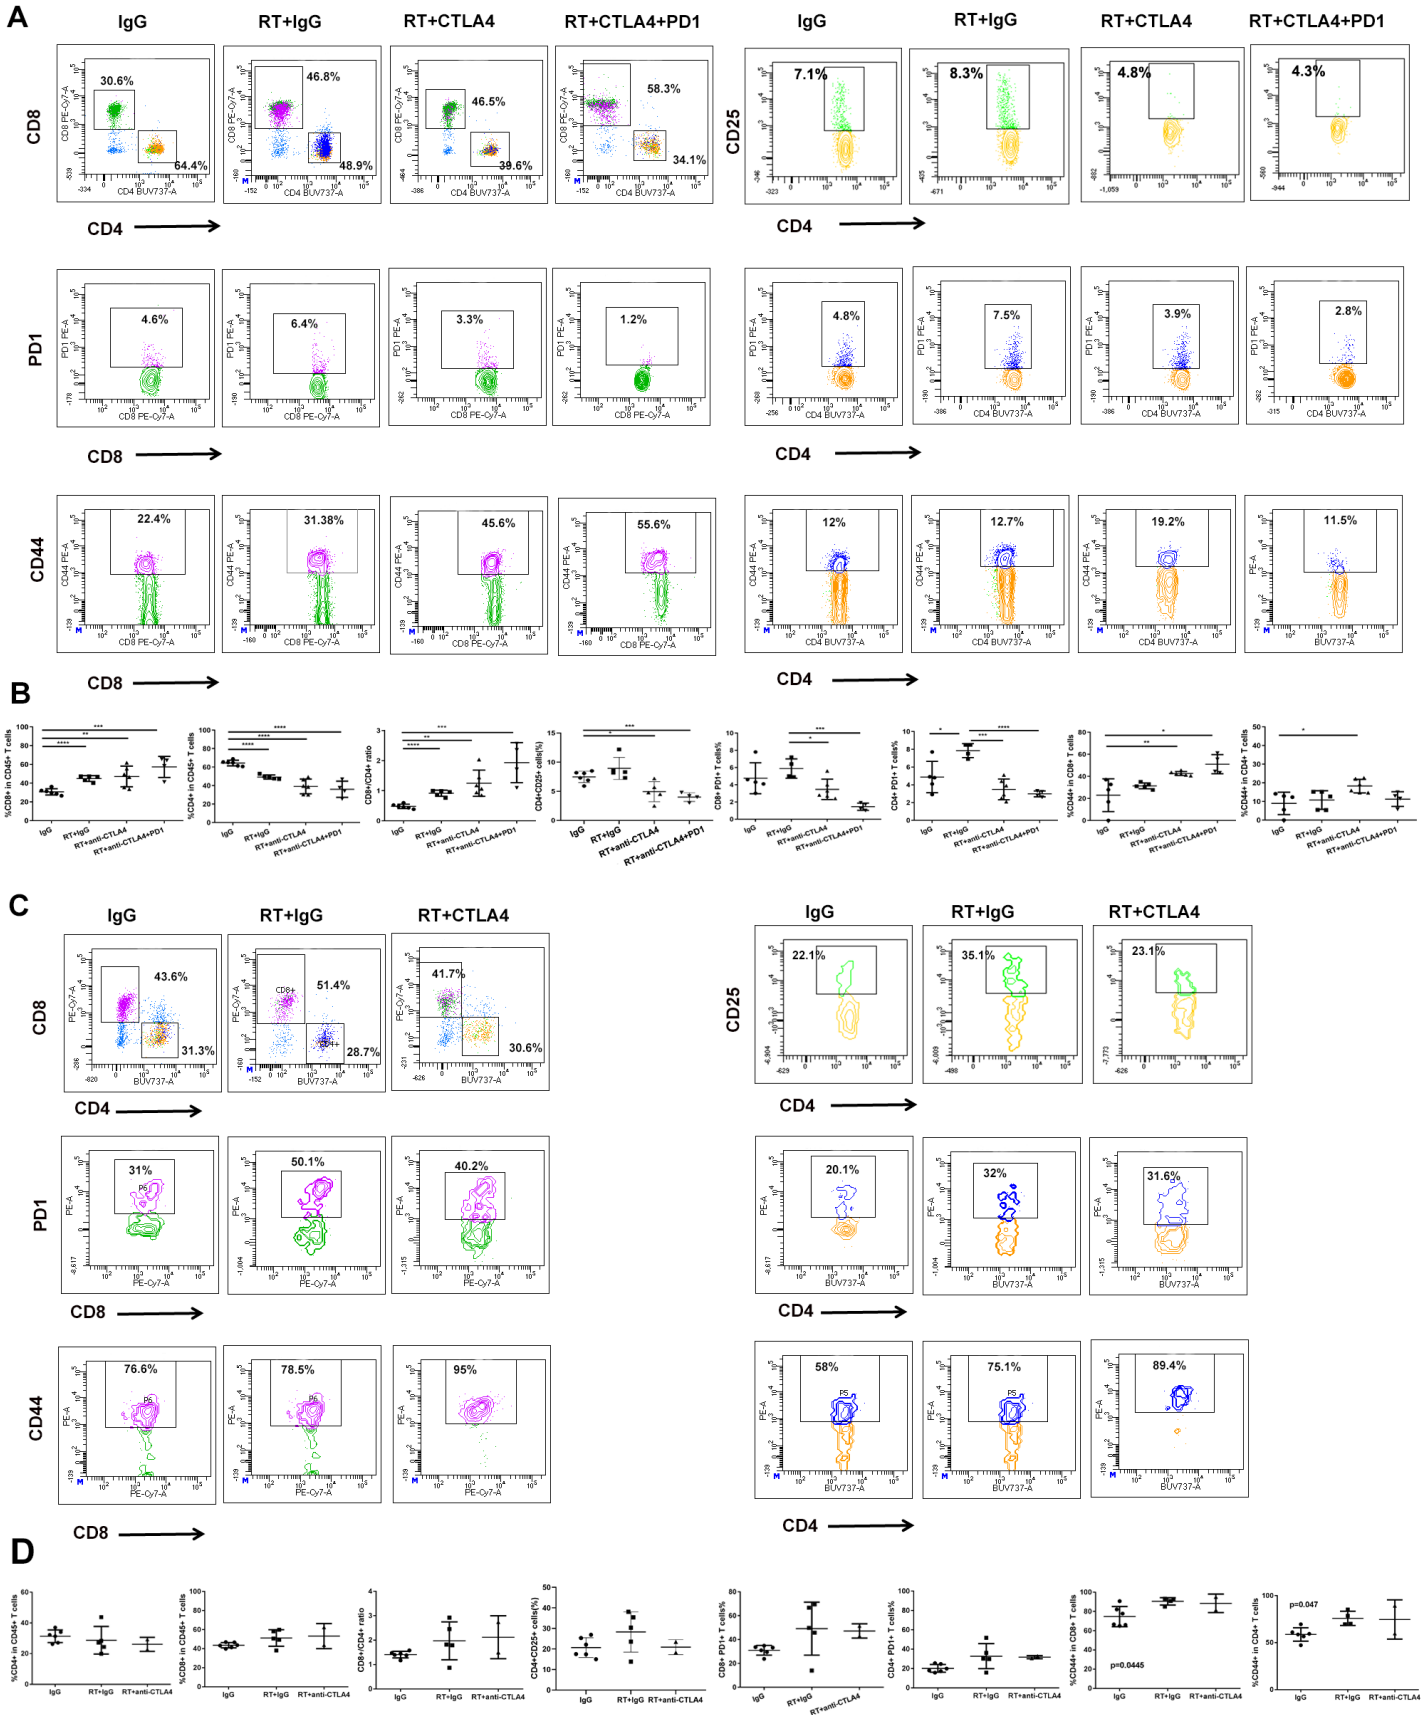

Supplement: jitc-2020-000826supp012_data_supplement.pdf [file jitc-2020-000826supp012_data_supplement.pdf]
